# Supplementary material
Source: Springer Nature journal article supplement (https://www.springermedizin.de/resource/supplementary/12943_2012_1060_MOESM10_ESM.pdf/9552198)

**A****ATP5A1**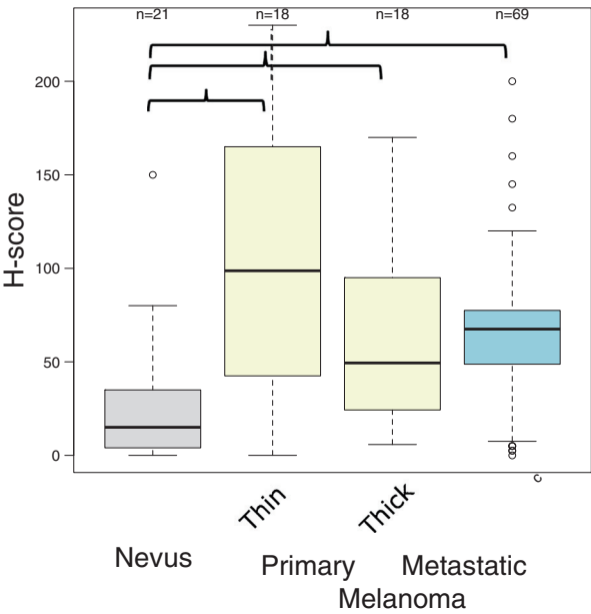**B****LDHB**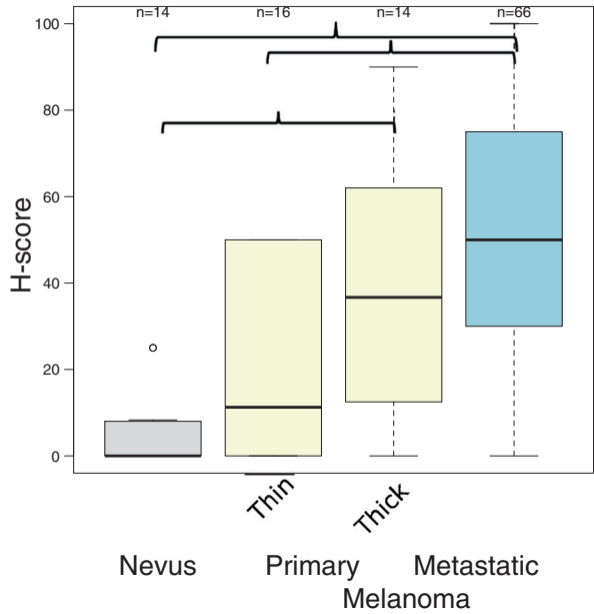

Supplement: MOESM10 [file 9552198]
